# Supplementary material for: TLR-independent control of innate immunity in Caenorhabditis elegans by the TIR domain adaptor protein TIR-1, an ortholog of human SARM
Source: Springer Nature journal article supplement (doi:10.1038/ni1060), 2004-03-28
Supplement: ni1060-S1.pdf [file ni1060-S1.pdf]

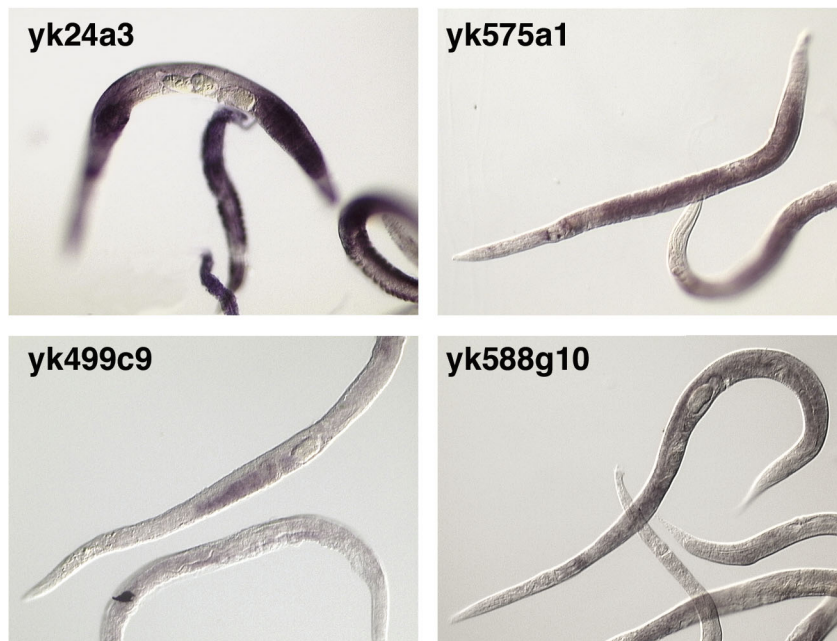

Figure S1. Adult expression pattern of *tir-1*, *rab-1* and *R53.4*. In situ hybridization using yk24a3 and yk575a1, specific for *tir-1*, and yk499c9 and yk588g10, specific for *rab-1* and *R53.4*, respectively. A strong hypodermal expression can be seen for *tir-1*, while *rab-1* and *R53.4* are broadly expressed. The level of *rab-1* expression is elevated in the germline. Whole mount in situ hybridizations were carried out as described at <http://nematode.lab.nig.ac.jp/method/index.html>.
